# THE AMERICAN JOURNAL OF PSYCHIATRY

## En este número

A22

### Perspectivas

#### Editoriales

- 241 **El diagnóstico de los trastornos de personalidad**  
Robert Michels
- 244 **¿Son buenos los estudios de observación para evaluar los resultados del tratamiento psiquiátrico?**  
T. Michael Kashner
- 248 **¿Son los adultos simplemente niños grandes?**  
Graham J. Emslie
- 251 **Eventos cerebrovasculares silenciosos y la enfermedad de Alzheimer: ¿una oportunidad de prevenir ignorada?**  
P. Murali Doraiswamy

#### Imágenes en Psiquiatría

- 255 **Los sacerdotes zoroástricos: antiguos psiquiatras persas**  
Arman Zargaran, Alireza Mehdizadeh, Hassan Yarmohammadi, and Abdolali Mohagheghzadeh

#### Tratamiento en Psiquiatría

- 256 **El efecto del bypass gástrico en la farmacocinética de los inhibidores de la recaptación de la serotonina**  
Giselle G. Hamad, Joseph C. Helsel, James M. Perel, Gina M. Kozak, Mary C. McShea, Carolyn Hughes, Andrea L. Confer, Dorothy K. Sit, Carol A. McCloskey, and Katherine L. Wisner [Audio](#) [Guías clínicas](#) [EMC](#)

#### Revisión y Resumen

- 264 **Alteraciones del transportador de dopamina estriatal en TDAH: ¿fisiopatología o adaptación a los psicoestimulantes? Un meta-análisis**  
Paolo Fusar-Poli, Katya Rubia, Giorgio Rossi, Giuseppe Sartori, and Umberto Balottin [Audio](#)

## Nuevas investigaciones

### Artículos

- 273 **Una taxonomía derivada empíricamente para el diagnóstico de personalidad: uniendo la ciencia y la práctica en la conceptualización de la personalidad**  
Drew Westen, Jonathan Shedler, Bekh Bradley, and Jared A. DeFife [Audio](#) [Guías clínicas](#) [Editorial](#)
- 285 **Medicamentos antiepilépticos para el trastorno bipolar y el riesgo de conducta suicida: un estudio de observación a lo largo de 30 años**  
Andrew C. Leon, David A. Solomon, Chunshan Li, Jess G. Fiedorowicz, William H. Coryell, Jean Endicott, and Martin B. Keller [Audio](#) [Guías clínicas](#) [EMC](#) [Editorial](#)
- 292 **Un ensayo doble ciego controlado con placebo de la fluoxetina para comportamientos repetitivos y severidad global en los trastornos del espectro autista en los adultos**  
Eric Hollander, Latha Soorya, William Chaplin, Evdokia Anagnostou, Bonnie P. Taylor, Casara J. Ferretti, Stacey Wasserman, Erika Swanson, and Cara Settapani [Audio](#) [Guías clínicas](#) [Editorial](#)
- 300 **Asociación del embolismo cerebral con el deterioro cognitivo acelerado en la enfermedad de Alzheimer y la demencia vascular**  
Nitin Purandare, Alistair Burns, Julie Morris, Ewan P. Perry, Joanne Wren, and Charles McCollum [Audio](#) [Guías clínicas](#) [EMC](#) [Editorial](#)
- 309 **La interacción de los antecedentes de comportamiento suicida de los padres biológicos y la exposición a los trastornos psiquiátricos de los padres adoptivos en las hospitalizaciones por intento de suicidio de los adoptados**  
Holly C. Wilcox, S. Janet Kuramoto, David Brent, and Bo Runeson
- 316 **Incremento de la activación orbitofrontal medial y de la amígdala: evidencia para un endofenotipo del trastorno bipolar I a nivel de sistemas**  
Julia Linke, Andrea Victoria King, Marcella Rietschel, Jana Strohmaier, Michael Hennerici, Achim Gass, Andreas Meyer-Lindenberg, and Michèle Wessa

- 326 Baja disponibilidad del Receptor Nicotínico de Acetilcolina B2 en fumadores con esquizofrenia**  
Deepak Cyril D'Souza, Irina Esterlis, Michelle Carbuto, Maegan Krasenics, John Seibyl, Frederic Bois, Brian Pittman, Mohini Ranganathan, Kelly Cosgrove, and Julie Staley

### Comunicados y actualizaciones

#### Cartas al Editor

- 335** Cinco nuevos loci de esquizofrenia convergen sobre el mismo mecanismo celular: la vía AKT

#### Reseñas Bibliográficas

- 336** Manual de mentalización en la práctica de la salud mental  
Investigando el espectro autista: perspectivas contemporáneas  
Tricotilomanía, estrujarse la piel y otras conductas repetitivas centradas en el cuerpo  
Psiquiatría de desastres: disposición, evaluación y tratamiento
- 338** Corrección
- 339** Libros Recibidos

#### Otros temas de interés

- 340** Actos oficiales: evaluación psiquiátrica del riesgo de violencia
- 341** Educación médica Continuada
- A8** Directivos de la American Psychiatric Association
- A19** Calendario

#### Portada

En este número, Wilcox et al. (p. 309) intentan desentrañar la compleja interacción entre los genes y el entorno en un estudio longitudinal de 30 años sobre los efectos de la historia de los padres biológicos y adoptivos en las hospitalizaciones de adoptados por intento de suicidio. El alto riesgo genético de hospitalización psiquiátrica por riesgo de suicidio entre adoptados debido a la conducta suicida de sus padres biológicos se amplificó cuando la madre adoptiva también había sido hospitalizada por un trastorno psiquiátrico. Diseño de la portada de Steve Hennessey.

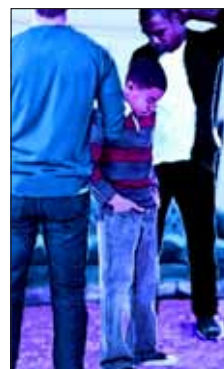

#### Audio

artículo en *AJP Audio*: archivo .mp3 descargable de [ajp.psychiatryonline.org](http://ajp.psychiatryonline.org)

#### Guías clínicas

este artículo ofrece guías clínicas (ver página "En este Número" o al final del artículo)

#### EMC

existe un curso en línea que cubre los contenidos de este artículo para los suscriptores del programa de cursos de EMC del AJP

#### Editorial

este artículo se discute en uno de los editoriales de este número
