# THE AMERICAN JOURNAL OF PSYCHIATRY

---

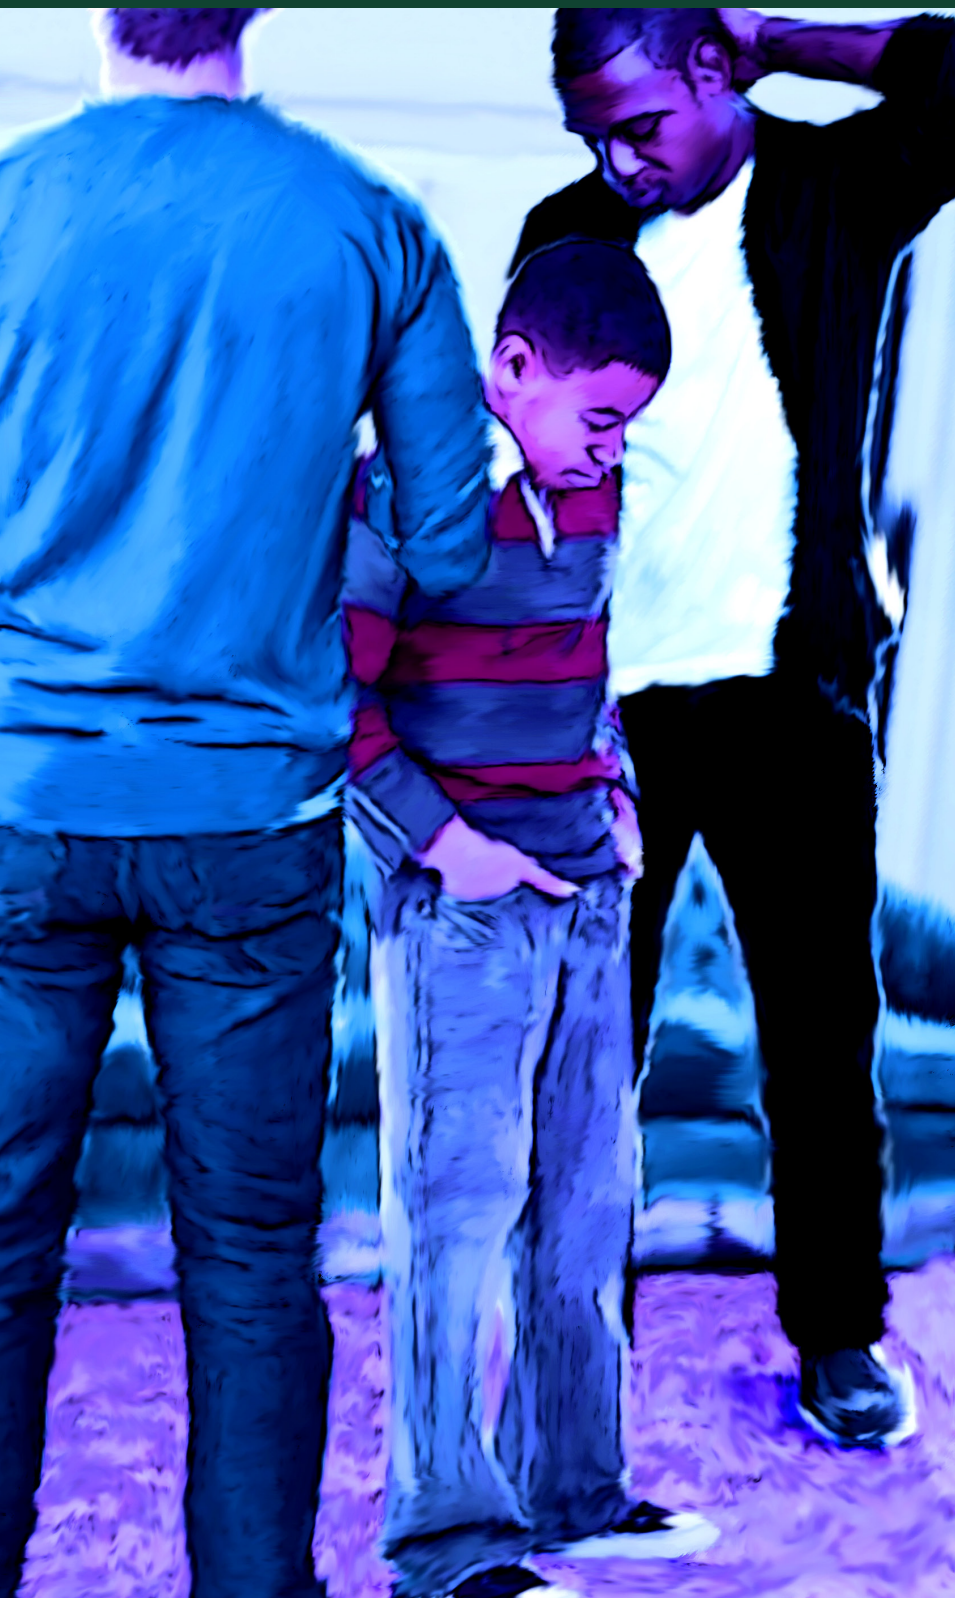

An Empirically Derived Taxonomy  
for Personality Diagnosis:  
Bridging Science and Practice in  
Conceptualizing Personality

Drew Westen, Ph.D., et al.

273

A Double-Blind Placebo-  
Controlled Trial of Fluoxetine for  
Repetitive Behaviors and Global  
Severity in Adult Autism Spectrum  
Disorders

Eric Hollander, M.D., et al.

292

Association of Cerebral Emboli  
With Accelerated Cognitive  
Deterioration in Alzheimer's  
Disease and Vascular Dementia

Nitin Purandare, Ph.D., F.R.C.Psych.,  
et al.

300

◀ The Interaction of Parental  
History of Suicidal Behavior and  
Exposure to Adoptive Parents'  
Psychiatric Disorders on Adoptee  
Suicide Attempt Hospitalizations

Holly C. Wilcox, Ph.D., et al.

309

March 2012

Volume 169 • Number 3

---

Official Journal of the  
AMERICAN PSYCHIATRIC ASSOCIATION

---

[ajp.psychiatryonline.org](http://ajp.psychiatryonline.org)
